# Supplementary material for: Biocompatibility Evaluation of TiO2, Fe3O4, and TiO2/Fe3O4 Nanomaterials: Insights into Potential Toxic Effects in Erythrocytes and HepG2 Cells
Source: MDPI journal article supplement (doi:10.3390/nano13212824), 2023-10-25
Supplement: s1 [file s1]

# Biocompatibility evaluation of TiO<sub>2</sub>, Fe<sub>3</sub>O<sub>4</sub>, and TiO<sub>2</sub>/Fe<sub>3</sub>O<sub>4</sub> nanomaterials: insights into potential toxic effects in erythrocytes and HepG2 cells

Luis Paramo<sup>1</sup>, A. Jiménez-Chávez<sup>2</sup>, Iliana E Medina-Ramírez<sup>3</sup>, Harald N. Böhnelt<sup>4</sup>, Luis Escobar-Alarcón<sup>5</sup>, Karen Esquivel<sup>1</sup>

<sup>1</sup> División de Investigación y Posgrado, Facultad de Ingeniería, Universidad Autónoma de Querétaro, Cerro de las Campanas, Santiago de Querétaro 76010, Mexico.

<sup>2</sup> Departamento de Toxicología, Centro de Investigación y de Estudios Avanzados del IPN (CINVESTAV-IPN), Ciudad de México, México

<sup>3</sup> Department of Chemistry, Universidad Autónoma de Aguascalientes, Aguascalientes 20131, Mexico.

<sup>4</sup> Centro de Geociencias, Universidad Nacional Autónoma de México, Campus Juriquilla. Blvd. Juriquilla, 3001, Santiago de Querétaro 76230, Mexico.

<sup>5</sup> Departamento de Física, Instituto Nacional de Investigaciones Nucleares, Carr. México-Toluca, La Marquesa, Ocoyoacac 52750, Mexico.

## Electronic Supplementary Material

| Tube      | Concentration (µg/mL) | NMs (µL) | PSS (mL) | distilled water (mL) | Blood (µL) |
|-----------|-----------------------|----------|----------|----------------------|------------|
| Control + | -                     | -        | 0        | 10                   | 100        |
| Control - | -                     | -        | 10       | 0                    | 100        |
| 1         | 10                    | 100      | 9.9      | 0                    | 100        |
| 2         | 30                    | 300      | 9.7      | 0                    | 100        |
| 3         | 50                    | 500      | 9.5      | 0                    | 100        |
| 4         | 70                    | 700      | 9.3      | 0                    | 100        |

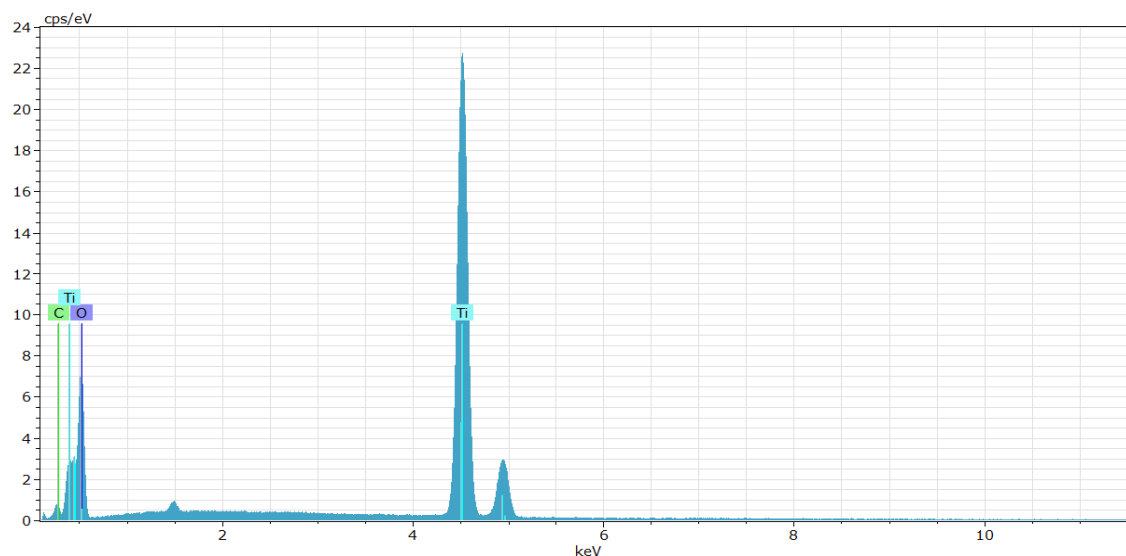

Figure S1. EDX elemental spectra of TiO<sub>2</sub>

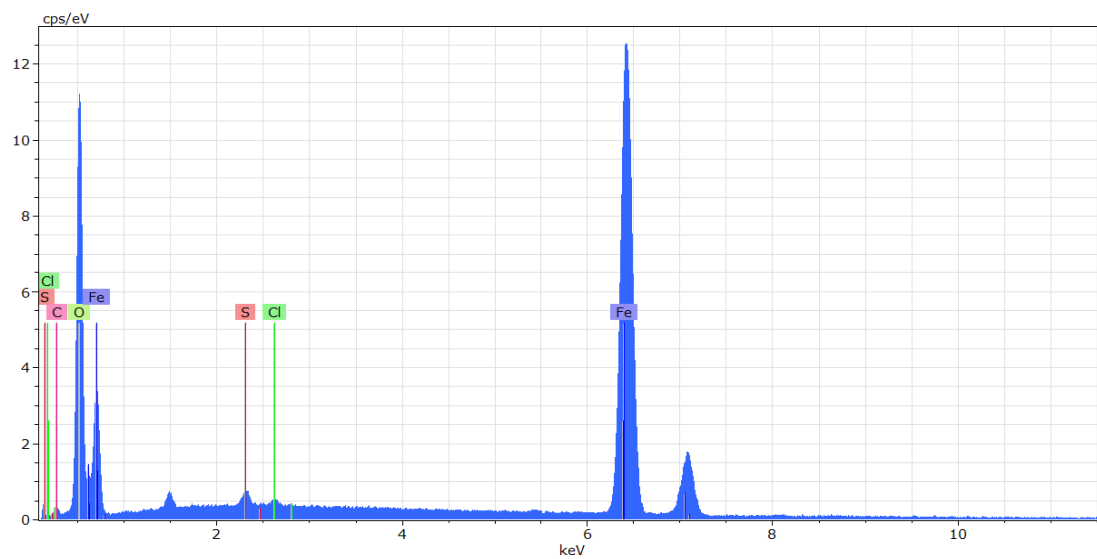

Figure S2. EDX elemental spectra of Fe<sub>3</sub>O<sub>4</sub>

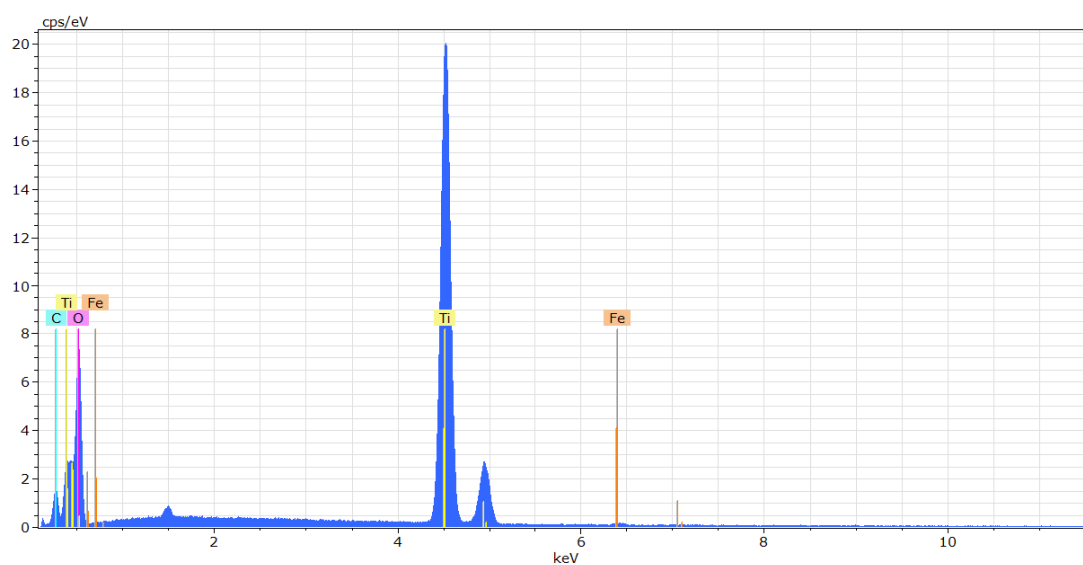

Figure S3. EDX elemental spectra of TiO<sub>2</sub>/Fe<sub>3</sub>O<sub>4</sub> composite.

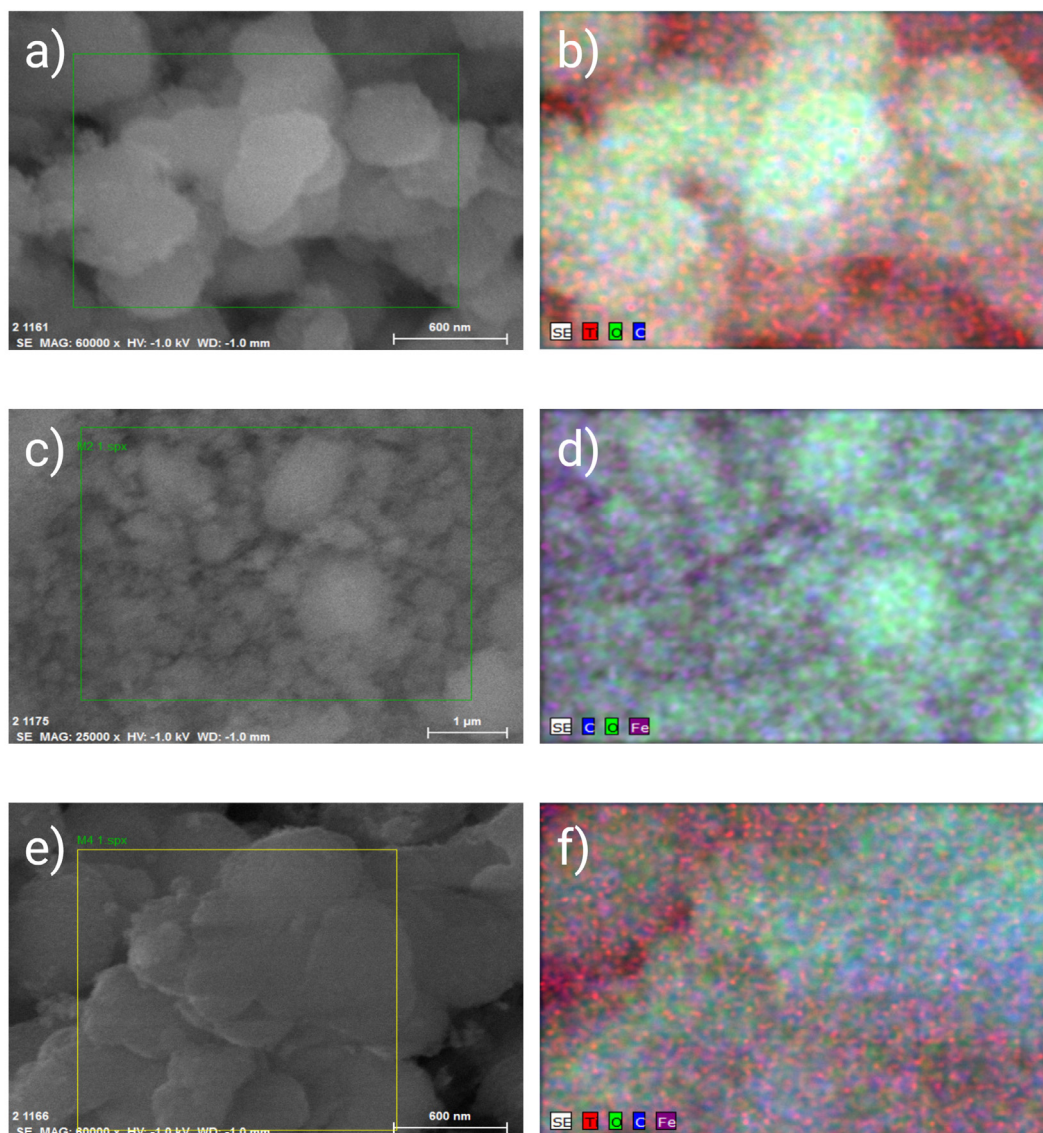

Figure S4. EDX elemental mapping zone and elemental mapping of a,b) TiO<sub>2</sub>, b,c) Fe<sub>3</sub>O<sub>4</sub> and e,f) TiO<sub>2</sub>/Fe<sub>3</sub>O<sub>4</sub>.

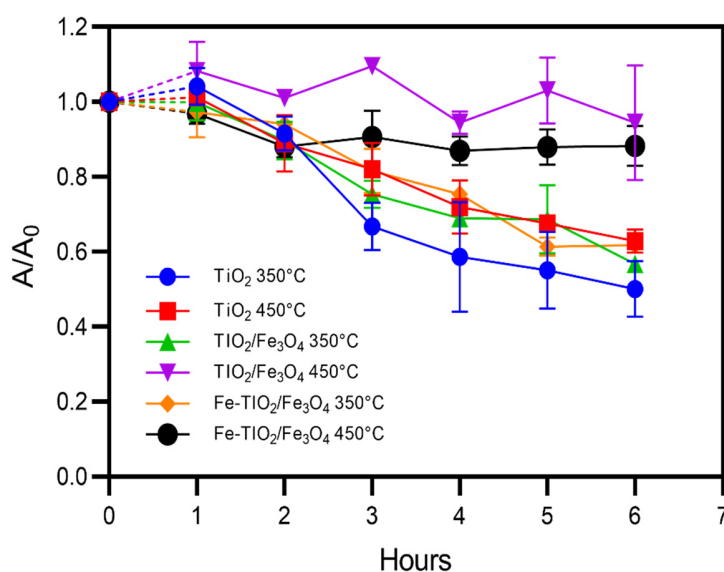

Figure S5. Photocatalytic degradation of paracetamol under UV light.

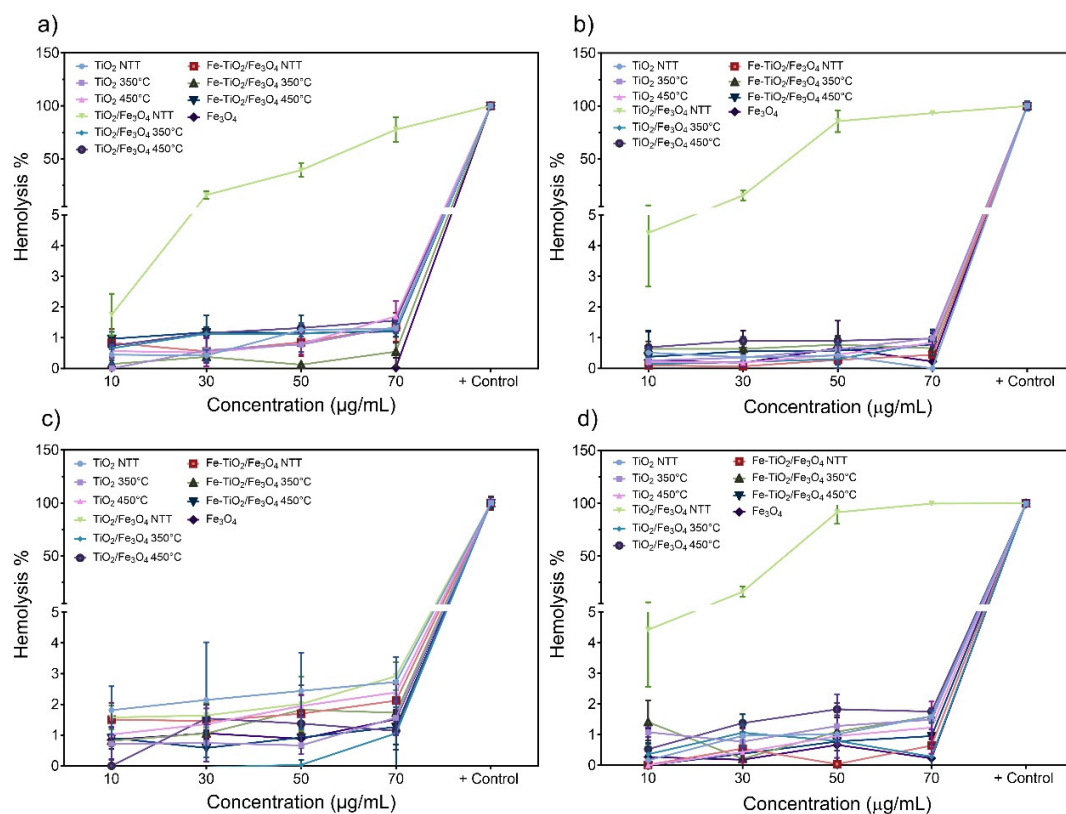

Figure S6. Hemolysis assay of NMs interaction with a) blood and plasma in a dark environment, b) blood and plasma under light exposure, c) blood without plasma under a dark environment, and d) blood without plasma under light exposure.
